# Supplementary material
Source: publisher site journal article supplement (https://www.dovepress.com/article/584361)
Supplement: Supplementary file 1 [file Supplimentary%20materials.pdf]

## Supplementary Materials

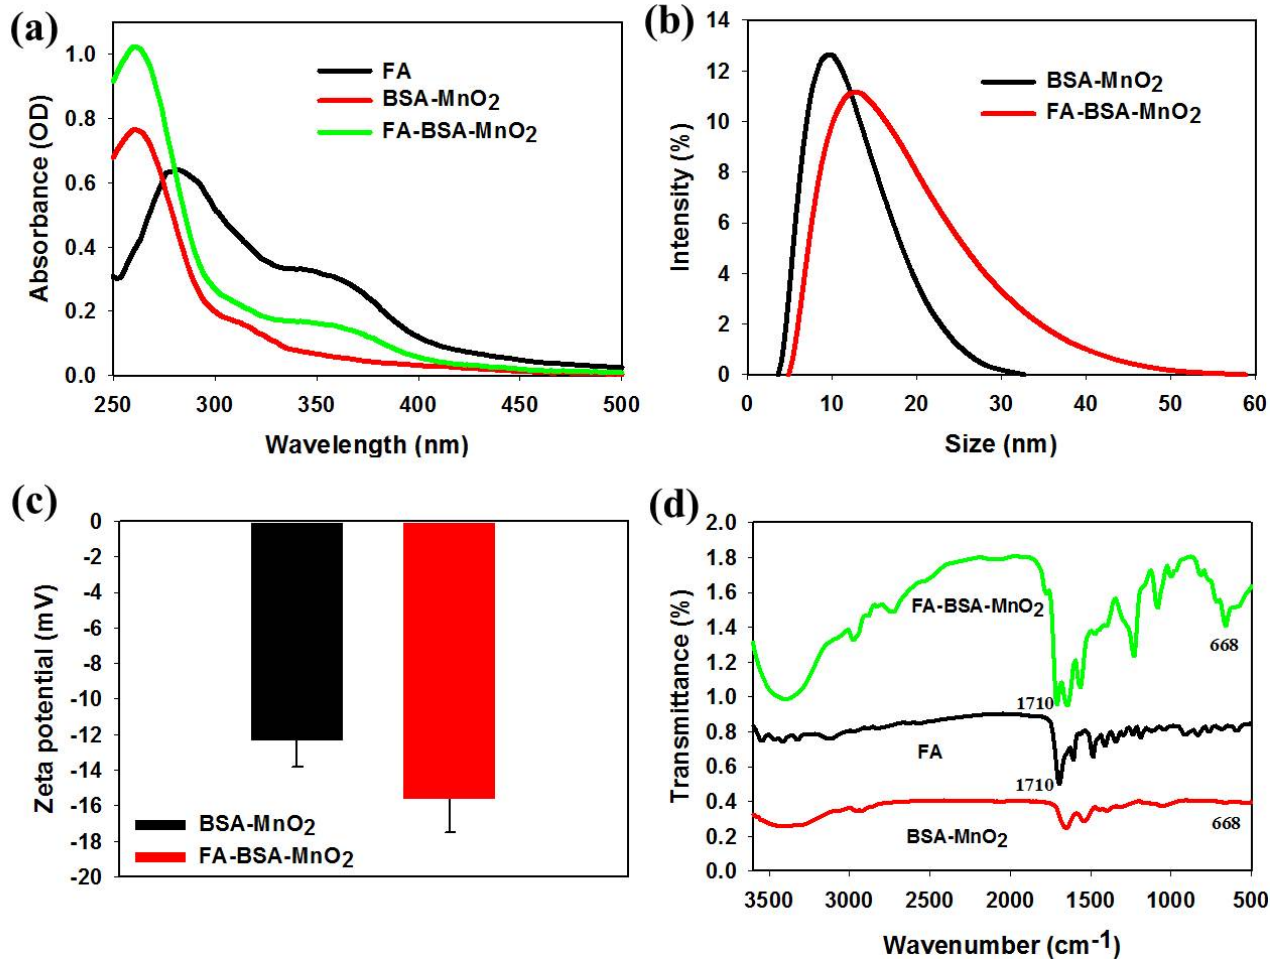

**Figure S1** The UV- Visible spectroscopy (a), particle size distribution (b), zeta potential (c), and Fourier transform infrared (FTIR) spectroscopy (d) analysis of BSA-MnO<sub>2</sub> and FA-BSA-MnO<sub>2</sub>. The values are reported as mean  $\pm$  SD from three experiments (n = 3).

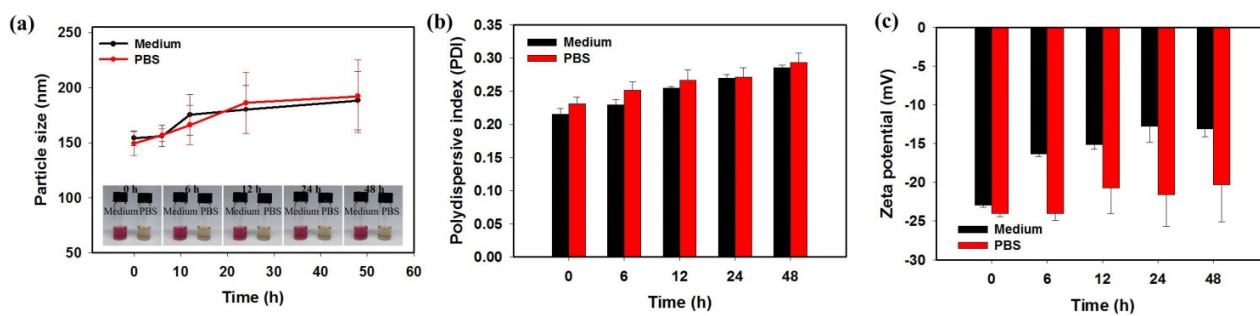

**Figure S2** The suspension stability of rGOQD/MnO<sub>2</sub>/CpG/Q/FA in PBS and cell culture medium (90% DMEM + 10% FBS) form changes in average particle size/gross observation (a), polydispersity index (b), and zeta potential (c). The values are reported as mean ± SD from three experiments (n = 3).

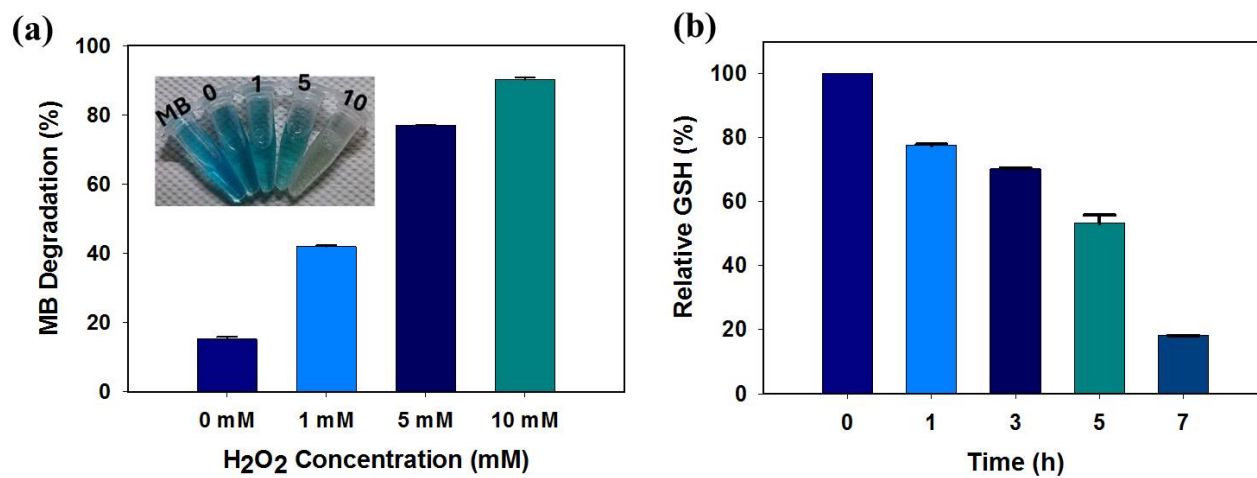

**Figure S3** Detection of hydroxyl radical ( $\cdot\text{OH}$ ) generation via methylene blue (MB) degradation in the presence of hydrogen peroxide (a), and assessment of GSH scavenging using DTNB as a colorimetric probe (b). The values are reported as mean  $\pm$  SD from five experiments ( $n = 5$ ).

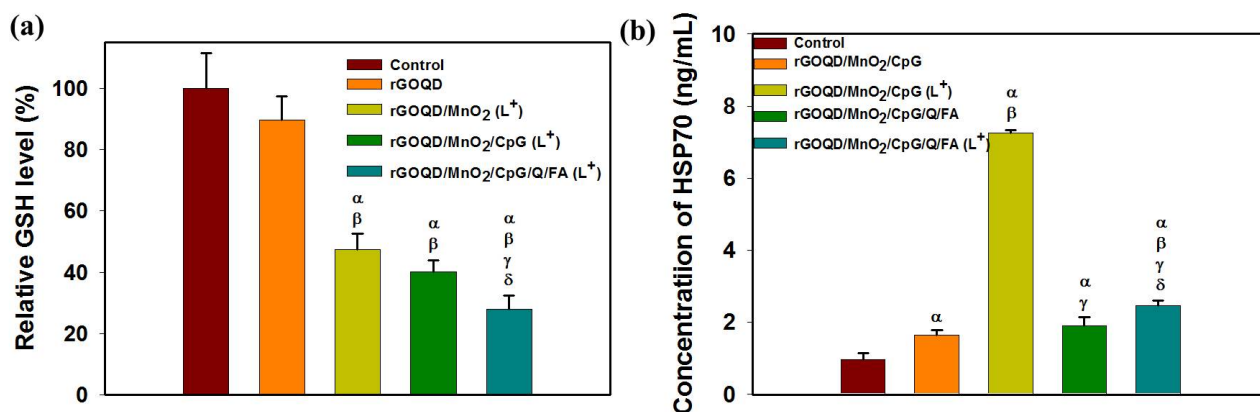

**Figure S4.** Intracellular GSH measurement utilizing DTNB as a fluorescent probe (a) and quantification of intracellular HSP70 expression levels (b) after treating B16F10 cells with PBS (control) and different nanoparticles. The values are reported as mean  $\pm$  SD from five experiments ( $n = 5$ ). The L<sup>+</sup> group is with NIR laser irradiation.  $^{\alpha}p < 0.05$  compared with control,  $^{\beta}p < 0.05$  compared with rGOQD/MnO<sub>2</sub>/CpG,  $^{\gamma}p < 0.05$  compared with rGOQD/MnO<sub>2</sub>/CpG (L<sup>+</sup>), and  $^{\delta}p < 0.05$  compared with rGOQD/MnO<sub>2</sub>/CpG/Q/FA.

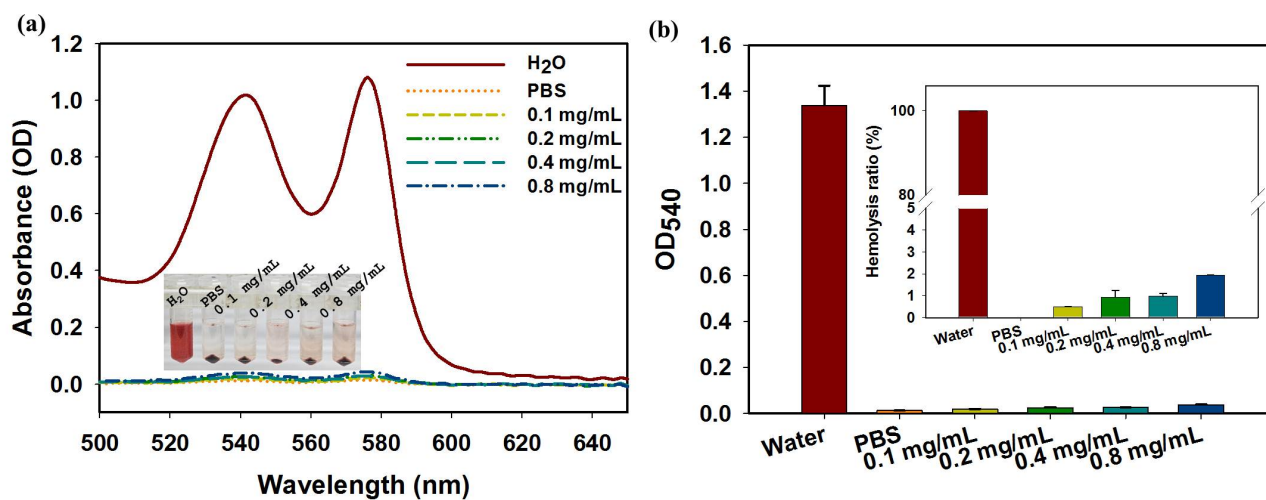

**Figure S5** Hemocompatibility evaluation from UV–Vis absorbance spectra of released hemoglobin by incubating red blood cells with different concentrations of rGOQD/MnO<sub>2</sub>/CpG/Q/FA (a), and hemolysis ratio (%) calculated from the absorbance at 540 nm (OD<sub>540</sub>) (b). The values are reported as mean ± SD from three experiments (n = 3). Water is the positive control, and PBS is the negative control.

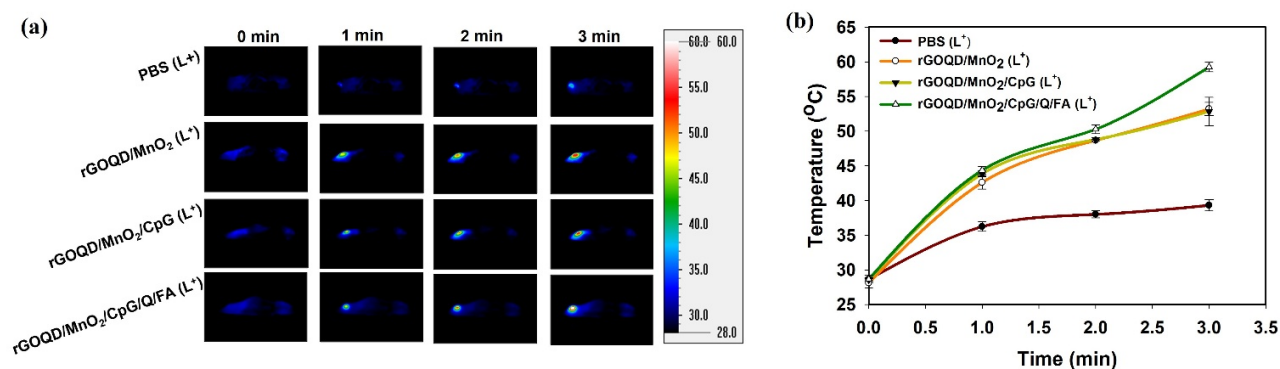

**Figure S6.** Representative real-time infrared thermal images of B16F10 tumor-bearing mice treated with PBS (L<sup>+</sup>), rGOQD/MnO<sub>2</sub> (L<sup>+</sup>), rGOQD/MnO<sub>2</sub>/CpG (L<sup>+</sup>), and rGOQD/MnO<sub>2</sub>/CpG/Q/FA (L<sup>+</sup>) (a), and the corresponding time-lapsed temperature variation curves (b). The values are reported as mean  $\pm$  SD from three experiments (n = 3).

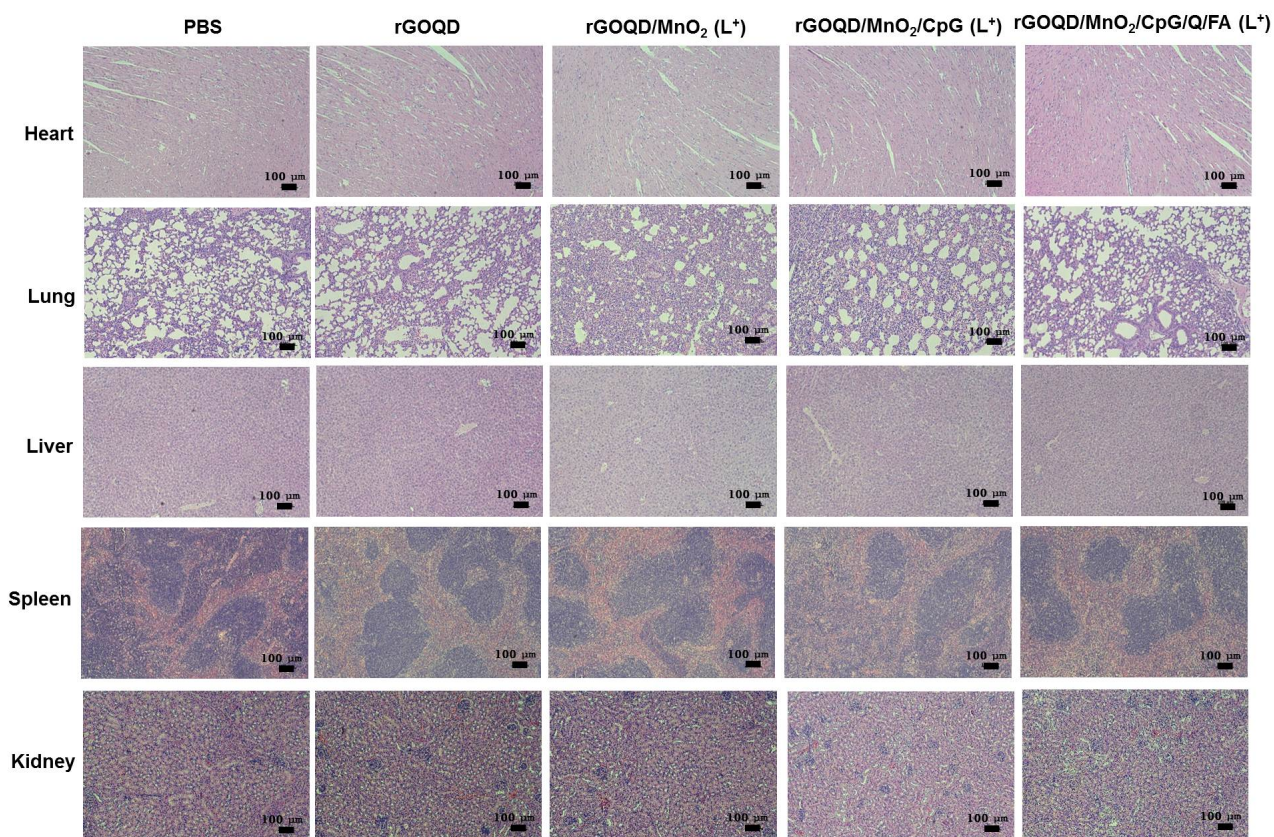

**Figure S7.** H&E stain images of the major organs (heart, lung, liver, spleen, and kidney) excised from sacrificed mice after different treatments (bar = 100  $\mu\text{m}$ ). The L<sup>+</sup> group is with NIR laser irradiation.

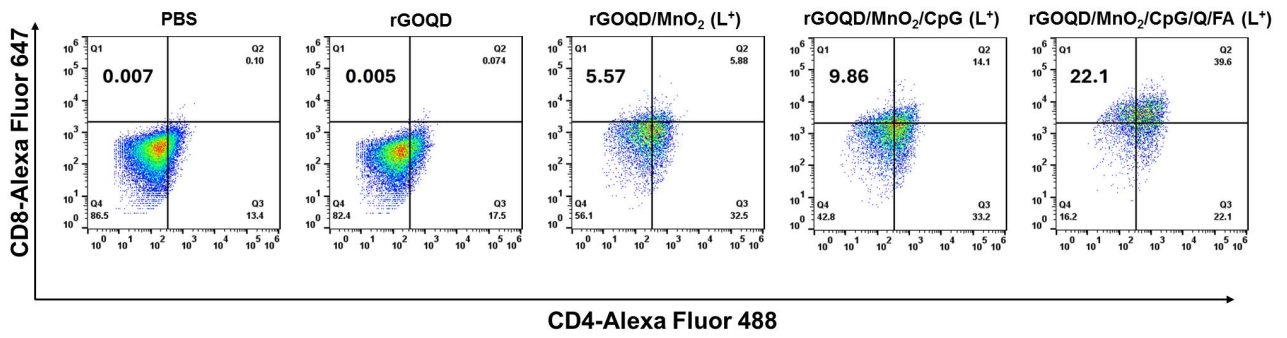

**Figure S8** Flow cytometry analysis of CD4<sup>+</sup> and CD8<sup>+</sup> T cells in tumor tissues. The L<sup>+</sup> group is with NIR laser irradiation.
